# Supplementary material
Source: PubMed Central journal article supplement (PMC8617421)
Supplement: pnas.2115410118.sapp.pdf [file pnas.2115410118.sapp.pdf]

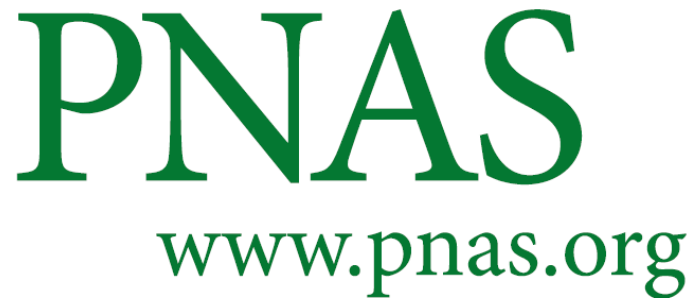

## Supplementary Information for

### Decidual NK cells kill Zika virus-infected trophoblasts

Sumit Sen Santara<sup>1#</sup>, Ângela C. Crespo<sup>1,2#</sup>, Sachin Mulik<sup>1,4#</sup>, Cristian Ovies<sup>1</sup>, Tamara Tilburgs<sup>2,5</sup>, Selma Boulouar<sup>3</sup>, Jack Strominger<sup>2</sup>, Judy Lieberman<sup>1\*</sup>

<sup>1</sup>Program in Cellular and Molecular Medicine, Boston Children's Hospital and Department of Pediatrics, Harvard Medical School, Boston MA 02115 USA

<sup>2</sup>Department of Stem Cell and Regenerative Medicine, Harvard University, Cambridge MA 02138 USA

<sup>3</sup>Department of Neurology, Brigham and Women's Hospital, Harvard Medical School, Boston MA 02115 USA

<sup>4</sup>Present address: Department of Pulmonary Immunology, Center for Biomedical Research, The University of Texas Health Science Center at Tyler, Tyler, TX 75708, USA

<sup>5</sup>Present address: Division of Immunobiology and Center for Inflammation and Tolerance, Cincinnati Children's Hospital, and Department of Pediatrics, University of Cincinnati College of Medicine, Cincinnati, OH 45229 USA

#equal contribution

\*Correspondence: [judy.lieberman@childrens.harvard.edu](mailto:judy.lieberman@childrens.harvard.edu)

#### This PDF file includes:

- Supplementary text
- Figures S1 to S5
- Tables S1 and S2
- Supplementary References

## Supplementary Information Text

### Materials and Methods

**Isolation of human dNK and trophoblasts.** Discarded, de-identified healthy human placental and decidual tissue (gestational age 6-12 weeks) were obtained from women undergoing elective pregnancy termination at a local reproductive health clinic with approval from Harvard and Boston Children's Hospital Human Institutional Review Committees, which deemed this study exempt from human subject regulations. Tissue samples that showed signs of inflammation or discoloration were not used. Briefly, decidual and villous tissues were macroscopically identified and separated. Primary trophoblast cells were isolated from villous tissue by gently removing the basal membrane and digesting for 8 min at 37°C with 75 ml of 0.2% trypsin 0.02% EDTA. DMEM/F-12 medium (25 ml) containing 10% Newborn Calf Serum (NCS) and 1% Pen/Strep was added and the digested tissue was filtered over a gauze mesh. The filtrate was washed and layered on Ficoll for density gradient centrifugation (20 min, 800g). Cells were collected from the interface, washed with DMEM/F12 medium with 10% NCS and incubated for 20 min at 37°C in a tissue culture dish to remove adherent macrophages. EVT were obtained after sorting for live large CD45<sup>-</sup> cells (and washing away non-adherent cells after overnight culture), or sorting CD45<sup>-</sup>B7-H3<sup>+</sup>CD49a<sup>+</sup> cells. Sorted cells were plated in 48 well plates coated with 20 µg/ml fibronectin in EVT medium (DMEM/F12 medium supplemented with 10% NCS, 1x Pen/Strep, 1x insulin, transferrin, selenium (ITS), 5 ng/ml EGF, and 400 units human gonadotropic hormone) and allowed to adhere overnight, or resuspended in the ZIKV inoculum and plated for 1 h before adding the same volume of EVT medium as the inoculum, and then allowed to adhere overnight (1, 2). Decidual tissue was washed with PBS, minced and digested with 0.25% collagenase type IV and 0.025% DNase I with gentle shaking in a water bath for 75 min at 37°C. Released lymphocytes were washed with RPMI 10% FBS (8 min, 1800 rpm), filtered through 100, 70 and 40 µm sieves, and the filtrate was resuspended in 20 ml 1.023 g/ml Percoll and layered on a Percoll gradient (10 ml 1.080 g/ml topped with 15 ml 1.053 g/ml) for density gradient centrifugation (25 min/800 g). Lymphocytes were isolated from the 1.080 g/ml/1.053 g/ml interface, washed twice with RPMI 10% FBS and stained and sorted for dNK cells using a previously described gating strategy (3). Human dNK were cultured in X-VIVO 10<sup>TM</sup> media with gentamicin supplemented with 5% human AB serum and 2.5 ng/ml recombinant human IL-15 for 12-18 h prior to experiments. pNK were isolated using a RosetteSep human NK enrichment cocktail followed by Ficoll density gradient centrifugation (20 min, 800 g).

**Cell lines.** JEG-3, 721.221, U-251, HFF and Vero were from ATCC. Cell lines were recent passages and were periodically tested for mycoplasma contamination; flow cytometry was used to confirm surface markers. 721.221 were cultured in RPMI 1640 supplemented with 10% FCS, 1% Pen/Strep and 1% L-glutamine. JEG-3, Vero, HFF and U-251 were cultured in DMEM supplemented with 10% FCS, 1% Pen/Strep and 1% L-glutamine.

**Viruses.** ZIKV strain PRVABC59 (Puerto Rico, 2015) was obtained from the Arbovirus Branch of the Centers for Disease Control and Prevention (CDC). ZIKV strain MR766 and HSV-2 were obtained from ATCC. HCMV AD169 (IE-1-GFP) was a gift from Daniel Coen (Harvard Medical School). ZIKV stocks were propagated in DMEM supplemented with 2% heat-inactivated FBS in Vero cells. Viral titers were determined by plaque assay on Vero cells incubated for 3 days using a 1.2% Avicel overlay. HCMV was propagated in HFF in DMEM supplemented with 3% FBS and supernatants were collected 8 d post infection. Viral titers were determined by counting GFP<sup>+</sup> foci on HFF cells 2 d post infection using a 1.2% methylcellulose overlay. HSV-2 was grown in Vero cells and viral titers were determined by plaque assay in Vero cells.

**Infection and tunicamycin treatment of cell lines and primary cells.** JEG-3 and U-251 were infected with ZIKV for 1 h in DMEM with 2% FCS using the indicated MOI. Fresh culture media was added after the 1 h incubation with the inoculum. Infected cells were cultured for indicated times before harvesting for assays. In some cases, JEG-3 were pre-treated with 10 µM salubrinal for 1 h before infection, and salubrinal was kept in the culture media post infection. CD45<sup>-</sup> placental cell

suspensions (Figure S3 and HLA-C expression in Figure 3) or purified EVT (sorted on CD49a<sup>+</sup>B7-H3<sup>+</sup> - all of Figure 3 except HLA-C expression) were infected while still in suspension with 400  $\mu$ l of 10<sup>12</sup> PFU/ml ZIKV PRVABC59. After 1 h, the same volume of EVT media as the inoculum was added, and the cells were allowed to adhere for 24 h in fibronectin-coated plates before analysis of infection and MHC expression, or removal of viral supernatant and addition of dNK for functional assays. Analysis of HLA-C expression was performed in infected cell suspensions and not purified EVT because the HLA-C antibody is not conjugated and requires an anti-mouse secondary, which cannot be done in cells sorted by labeling with mouse antibodies. The staining strategy to measure HLA-C only in EVT is described in the Flow Cytometry section. JEG-3 were infected with MOI 0.5 HSV-2 for 1 h, then medium was aspirated and cells were cultured in fresh medium for 1 or 2 d. For HCMV infection, cells were spinoculated with MOI 4 (1 h, 2800 rpm) virus, and the inoculum was maintained during 12 h culture at 37°C. Spinoculation and culture were repeated once or twice with fresh inoculi to enhance infection rates and then medium was aspirated and cells were cultured in fresh medium for 12 h before harvesting or use for NK functional assays. In some experiments, cells were treated with 0.5  $\mu$ g/ml tunicamycin for 24 h, with or without salubrinal pretreatment 1 h earlier. Salubrinal was kept in the culture throughout tunicamycin treatment.

**Culture, infection and imaging of placental villi.** Villous trees (3-5  $\mu$ m length) from 3 donors were dissected and cultured in Transwell inserts (0.4  $\mu$ m pore, Costar) coated with Matrigel. Villi were allowed to invade the Matrigel for 12-15 h with collection medium (DMEM/F12 with 2.5% FBS, 1% Pen/Strep, 50 mg/ml gentamicin and 1.25 mg/ml amphotericin) only in the bottom well (4). For infection, villi were incubated with 10<sup>8</sup> PFU ZIKV PRVABC59 for 1 h, followed by addition of fresh villous medium on top and bottom (DMEM/F12 with 20% FCS and 1x P/S). The viral inoculum was removed after 24 h and substituted by fresh villous medium. Infection lasted a total of 72 h. 1 million autologous dNK (in the presence of 2.5 ng/ml IL-15) were added or not after the first hour of infection. Viability of villi was verified by MTT assay: villi were weighed (mg) on the first day of culture for normalization, and villi were incubated with MTT reagent (2.5 mg/ml) at each time point for 3 hours. MTT reagent was removed and solvent (4 mM HCl in isopropanol) was added to the tissue. Absorbance of the solvent was measured at 590 nm and 570 nm and normalized to weight. Viability was calculated by dividing the absorbance/mg of the tissue at each time point by the absorbance/mg of the tissue at the day of collection (considered 100%).

**NK functional assays.** dNK killing of 721.221 and JEG-3, infected or not for 48 h or treated with tunicamycin for 24 h with or without salubrinal pre-treatment as indicated, was analyzed by 8 h <sup>51</sup>Cr release assay using E:T ratios indicated in each experiment, performed in the presence of 2.5 ng/ml IL-15. To inhibit granule-mediated killing, NK were pre-treated with 2 mM EGTA for 30 min at 37°C, and EGTA was maintained during the co-culture. To block NK receptors, NK cells were pretreated for 30 min at 37°C with blocking or control antibodies that were maintained during co-culture (10  $\mu$ g/ml purified antibodies to NKp46 and NKp30 or mouse IgG1 as control). To assess viral inhibition, NK/JEG-3 co-culture supernatants were used to infect Vero cells and viral titers were assessed by plaque assay. To measure degranulation, dNK were co-cultured for 8 h with 721.221 (E:T ratio 1:3) or uninfected or ZIKV-PRVABC59 infected confluent JEG-3 in the presence of CD107a PerCP-Cy5.5 antibody (250 ng/ml) and 2.5 ng/ml IL-15. To measure intracellular cytokine production, 2  $\mu$ M monensin and 3  $\mu$ M brefeldin were added after 1 h of co-culture and cells were harvested 7 h later. Cells were stained for surface markers followed by permeabilization with Cytofix/Cytoperm and intracellular cytokine staining. To assess reduction of ZIKV infection in EVT by dNK, a 10-fold excess of dNK were added to ZIKV-infected EVT (after removal of viral supernatant from a 24 h infection) for 12 h in the presence of 2.5 ng/ml IL-15. dNK were washed away and EVT were trypsinized and stained for surface markers and intracellularly for flavivirus E protein and analyzed by flow cytometry.

**Flow Cytometry** Antibodies and reagents are listed in Supplemental Table S2. For surface staining, cells were stained for 30 min on ice in the dark with LIVE/DEAD-Violet stain (1:1000) and Annexin V-APC (1:100) in Annexin V buffer when applicable, and then with primary antibodies for 15-30 min in PBS, 2% FCS. HLA-C staining was performed on infected placental cell suspensions by staining with purified HLA-C antibody (DT9), followed by PE anti-mouse secondary for 15 min,

and finally with B7-H3 and CD49e conjugated antibodies to allow gating on EVT. Cells were fixed in 1% paraformaldehyde for 10 min before flow cytometry. For intracellular staining, cells were fixed and permeabilized using the BD CytoFix/CytoPerm kit. Analysis was performed on a FACSCanto II (BD) and sorting was done using a BD Aria II. BD FACSDiva 8.0 (BD) software was used for data collection, while analysis was performed with FlowJo v10.3 (BD).

**Confocal microscopy.** Uninfected or ZIKV-infected JEG-3 cells, cultured on 1.5 mm glass coverslips, were fixed with 4% paraformaldehyde for 10 min and then permeabilized with PBS/0.01% Triton-X for 10 min before blocking with 5% BSA in PBS and staining with purified anti-flavivirus Group Antigen antibody (1:500) for 3 h, followed by staining with donkey-anti-mouse AlexaFluor 488™ for 1 h. Cells were washed and stained with DAPI (4'6'-diamidino-2-phenylindole, 1: 1,000 dilution) for 10 min, and coverslips were mounted using lab-made self-sealing mounting media (Vinol) without DAPI. Villi explants were fixed in 4% paraformaldehyde for 30 min and dehydrated by immersion in 10% sucrose in PBS for 1 h, followed by 20% sucrose for 1 h and 30% sucrose overnight before embedding in OCT medium for flash freezing. Sections (5 µm) were cut using a cryostat (Microm HM 550, ThermoFisher Scientific) and adhered to positive charged glass slides (Denville). OCT was removed by immersion in 1x PBS and tissue was blocked for 30 min in buffer (1% BSA, 22.52 mg/mL glycine, 0.1% Tween 20 in PBS), and then stained overnight at 4°C with primary antibodies to detect CDH-1 (1:25, mouse), CD49a (1:50, rabbit), SDC-1 (1:25, mouse), ZIKV NS2B (1:200, rabbit) and anti-flavivirus Group Antigen antibody (1:200, mouse) in 1% BSA, 0.1% Tween 20 in PBS. After 3 washes in PBS, slides were stained with secondary antibodies (donkey anti-rabbit AlexaFluor 488™ and donkey anti-mouse AlexaFluor 647™ 1:1000) for 1 h at RT. Samples were counterstained with DAPI and mounted and imaged by fluorescence microscopy. To quantify the distribution of ZIKV-infected cell types or percentage of each cell type that were infected, EVT were identified as CD49a<sup>+</sup>CDH-1<sup>+</sup> cells in the tips of villi with large nuclei, CT were CDH-1<sup>+</sup> cells with smaller nuclei located under ST or EVT and ST were SDC-1<sup>+</sup> cells with very small nuclei forming a uniform layer on the outside of the villi. Cells were counted in 10-15 imaging fields of 3 different donors (217x magnification).

Cells and sections were imaged by confocal microscopy using an inverted, fully motorized Axio Observer spinning disk confocal microscope (Carl Zeiss Microimaging, Inc., Thornwood, NY) equipped with a cooled electron multiplication charge-coupled device (CCD) camera with 512 × 512 resolution (QuantEM, Photometrics, Tucson, AZ) and a CSU-X1 spinning disc (Yokogawa Electric, Tokyo, Japan) with lasers that were excited at 405, 488, 561 and 640 nm (Coherent, Santa Clara, CA) and emission filter ranges of 452/45, 525/50, 607/36 and 680 long-pass, respectively (Semrock, Rochester, NY). Images were processed using SlideBook V5.0 (Intelligent Imaging Inc., Denver, CO).

**qRT-PCR.** Total RNA was extracted from JEG-3, U-251 or E15.5 mouse placentas, fetuses and spleen using the RNeasy Mini kit, treated with DNase I and reverse transcribed using 2 µg of total RNA, 50 ng random hexamers, 400 nM dNTPs and 200 U SuperScript II reverse transcriptase kit. Primers and diluted cDNA samples were prepared with Power SYBR Green PCR Master Mix. Amplification cycles using the iQ5 system (BioRad) were 95°C for 10 min, then 40 cycles at 95°C for 10 sec and 55°C for 30 sec. Results were normalized to *ACTB*. Primer sequences are provided in Supplemental Table S1.

**Plasmid construction and transfection of JEG-3.** To express viral proteins, cDNA fragments of PRVABC59 (GenBank accession number KU501215) encoding the individual viral proteins were subcloned into Flag-tagged pcDNA3.1 or pFLAG-CMV4. Primer sequences are in Supplementary Table S1. JEG-3 were transiently transfected in 12-well plates (10<sup>5</sup> cells per well) using 1 µg DNA and FuGENE HD Transfection Reagent following the manufacturer's guidelines. ER stress was measured by detecting Firefly and Renilla luciferase activity in JEG-3 lysates of cells co-transfected with pFLAG-XBP1u-Fluc or p5xATF6-GL3 reporter and plasmids encoding individual viral genes. Luciferase activity was measured by Dual-Luciferase® Reporter Assay System. Firefly luciferase activity was normalized to Renilla luciferase activity.

**Mouse experiments.** *Ifnar1<sup>-/-</sup>* A129 (B6.129S2-*Ifnar1*<sup>tm1Agt</sup>/Mmjax) and C57BL/6 mice were obtained from Jackson Laboratory. Animal use was approved by the Animal Care and Use Committees of Boston Children's Hospital and Harvard Medical School. Virgin female *Ifnar1<sup>-/-</sup>* A129 mice (6-8 weeks old) were mated with male *Ifnar1<sup>-/-</sup>* A129 and the appearance of a vaginal plug was used to mark E0.5. On E6.5, mice were intraperitoneally infected with 10<sup>3</sup> PFU of ZIKV PRVABC59 in 0.2 mL of PBS. Mice were sacrificed at E15.5 and maternal blood and spleen, placenta and fetus were harvested, weighed and homogenized for viral loads on clarified samples (centrifugation at 2,000g at 4°C for 10 min) measured as above by plaque assay and/or by qRT-PCR as described (5). In some experiments, WT or A129 mice were injected intraperitoneally daily for 3 d beginning on E3.5 and on E10.5 with antibodies to CD8 T cells (0.5 mg/mouse rat anti-mouse CD8 mAb, clone 2.43) or NK cells (0.2 mg/mouse of rabbit anti-mouse asialo GM1) or a control antibody (clone LTF-2). Control antibodies were administered following the same regimen. To deplete B cells, a single dose of rabbit anti-mouse anti-CD20 (0.25 mg/mouse, Clone SA271G2) was injected intraperitoneally on E0.5 and repeated once every week. Pregnant animals were randomly assigned to experimental groups for depletion studies. Cell depletion was verified by flow cytometry of maternal blood mononuclear cells on E5.5.

**Mouse placental histology.** At least three mouse placentas per treatment condition from separate litters of dams sacrificed on day E15.5 were fixed in 10% neutral buffered formalin for 48 h and embedded in paraffin. Sections (3–5 µm) were stained with haematoxylin and eosin (H&E). For immunofluorescence staining, deparaffinized and permeabilized tissues were blocked in buffer (1% BSA, 22.5 mg/mL glycine, 0.1% Tween 20 in PBS) for 2 h before overnight incubation with primary antibodies. The following primary antibodies were used: pan-cytokeratin (1:500), vimentin (1:500, rabbit) and 1:200 mouse anti-ZIKV serum (prepared in our laboratory from infected mouse sera). After washing three times in PBS, secondary antibody conjugated with either AlexaFluor™ 488 or 647 (1:500) in 0.1% Tween 20 in PBS was added for 1 h at room temperature. Samples were counterstained with DAPI and mounted and analyzed by fluorescence microscopy as described above.

**Statistical analysis.** Values presented are the mean ± S.E.M. or median ± interquartile range, as indicated. Statistical analysis was performed using Prism 6.0c (GraphPad). Equality of variances was tested by Levene's test. Unpaired (Kruskal-Wallis test followed by Dunn's post-test) or paired (Friedman's test followed by Dunn's post-test) non-parametric one-way analysis of variance was used in experiments for which multiple comparisons were made. Non-parametric tests were used in experiments with human or animal samples because of the non-normal distribution of these data. Otherwise, one-way or two-way ANOVA (for technical replicates) followed by Tukey's or Sidak's post-test was used. For comparison of 2 unpaired groups in experiments with human samples/animals, Mann-Whitney or Kolmogorov-Smirnov test were used for groups with equal or unequal variances, respectively. For comparison of 2 paired groups, Wilcoxon rank sum test was used. Otherwise, unpaired or paired Student's t-tests (for technical replicates) were used.  $p < 0.05$  was required for significance. A chi-squared test was used to analyze the data in Figure 5A. Most experiments were not blinded as to group allocation, either while collecting data or assessing the results.

Figure S1

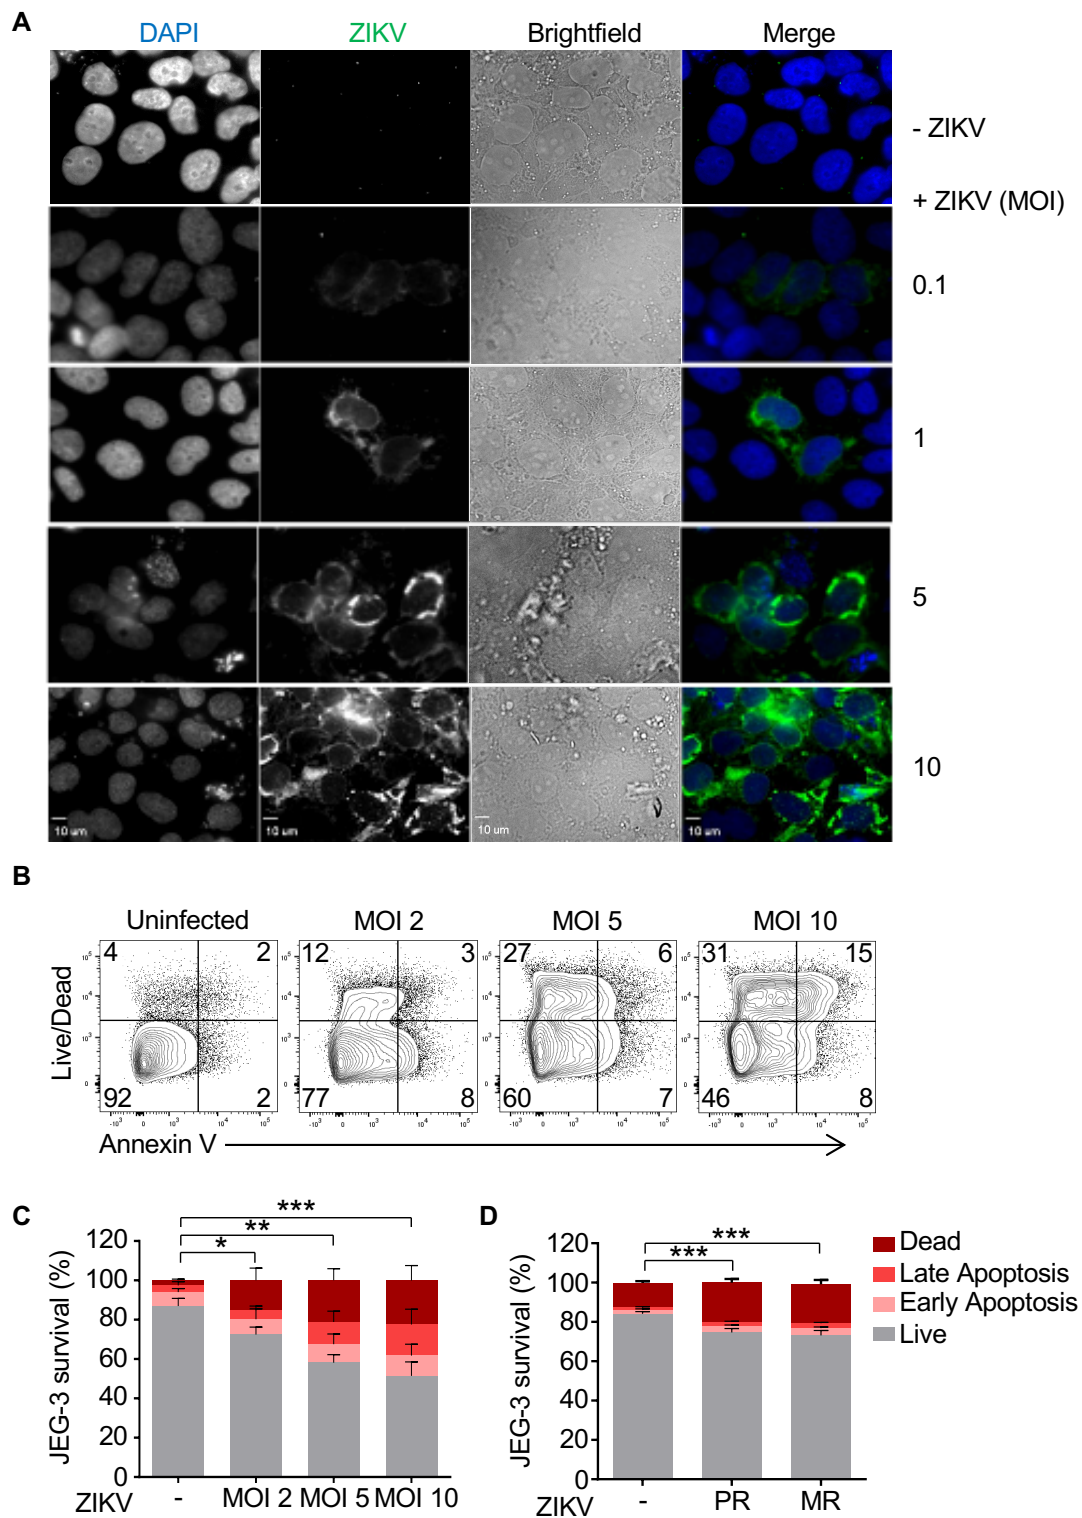

**Figure S1. ZIKV efficiently infects JEG-3 and causes cytopathicity.** (A) Fluorescence microscopy of JEG-3 infected with increasing ZIKV PRVABC59 strain MOI for 48 h and stained for anti-flavivirus group antigen and DAPI. Scale bars, 10  $\mu$ m. (B) Representative flow cytometry plots of LIVE/DEAD and annexin V stain of JEG-3 infected with increasing MOI of ZIKV PRVABC59 strain for 48 h. (C) Percentage of dead and apoptotic JEG-3 infected with increasing MOI of ZIKV PRVABC59 strain for 48 h. (D) Percentage of dead and apoptotic JEG-3 infected with MOI 2 virus of either PRVABC59 (PR) or MR766 (MR) strain for 48 h. Bars show the mean  $\pm$  SEM of 3 independent experiments. \*  $p < 0.05$ ; \*\*  $p < 0.01$ ; \*\*\*  $p < 0.001$  (two-way ANOVA followed by Tukey's multiple comparison test of the dead population). Early apoptotic cells are AnnexinV+LIVE/DEAD-, late apoptotic cells are AnnexinV+LIVE/DEAD+, dead cells are AnnexinV-LIVE/DEAD+.

**Figure S2**

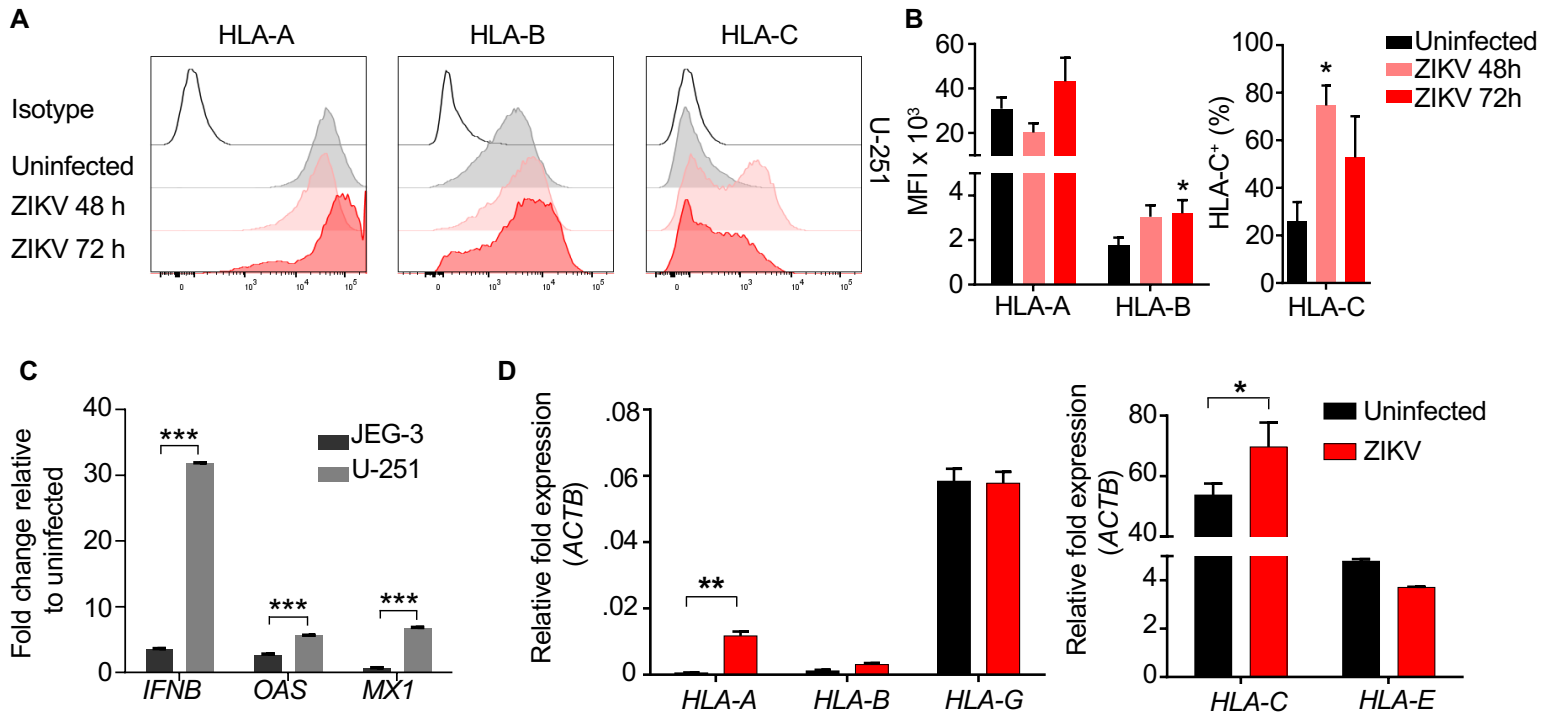

**Figure S2.** (A) Representative HLA-A, HLA-B and HLA-C flow cytometry histograms of U-251 cells (glioblastoma) that were uninfected or infected with MOI 5 of ZIKV PRVABC59 for 48 h or 72 h. (B) Mean fluorescence intensity (MFI) of HLA-A and HLA-B (left) and percentage of HLA-C<sup>+</sup> (right) U-251 cells that were uninfected or infected with MOI 5 of ZIKV PRVABC59 for 48 h or 72 h. (C) Fold change in *Ifnb*, *Oas* and *Mx1* mRNA expression in ZIKV-infected JEG-3 (MOI 2) and U-251 (MOI 5) cells after 72 h. (D) Fold change in HLA-A, HLA-B, HLA-C, HLA-G and HLA-E mRNA expression in JEG-3 cells 48 h after ZIKV PRVABC59 infection (MOI 2), relative to uninfected cells. Bars show mean ± S.E.M. of 3 independent experiments. \*, p < 0.05; \*\*, p < 0.01; \*\*\*, p < 0.001. by non-parametric one-way ANOVA (Friedman's test) with Dunn's post-test, comparing to the uninfected (B) and unpaired t-test (C, D)

**Figure S3**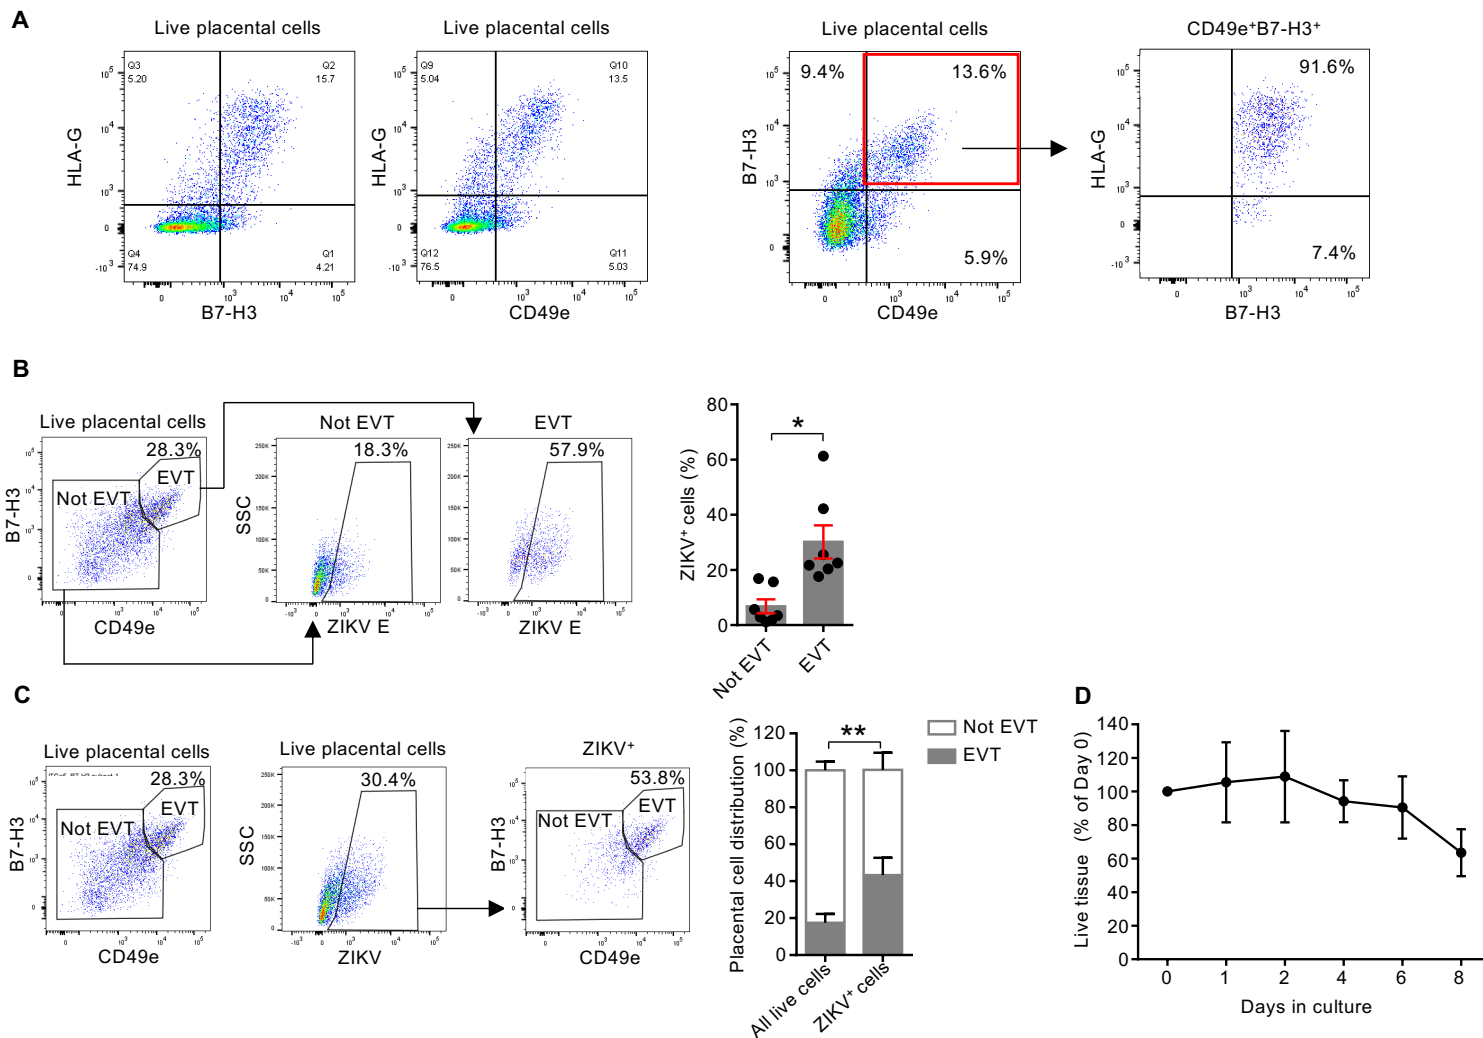

**Figure S3. Gating strategy for identification of EVT, infected placental cell distribution and viability of villi explants.** (A) Gating strategy for identification of extravillous trophoblast within isolated placental cell suspensions without using HLA-G. Cells isolated from human villi were stained with several cell type markers and analyzed by flow cytometry. After gating in live cells, the majority of EVT (HLA-G+ cells) were identified as double positive for CD49e (integrin  $\alpha 5$ ) and B7-H3. (B) Representative flow cytometry dot plots showing the percentage of ZIKV infected cells ( $10^{12}$  PFU) within EVT and other placental cells (left) and quantification (right) ( $n=7$ ). (C) Representative flow cytometry plots showing the distribution of EVT and other placental cells within the whole suspension or within only infected cells (left) and quantification (left) ( $n=7$ ). (D) Viability of human villi explants in Matrigel culture for up to 8 days, relative to day 0, measured by MTT assay. Tissue amount was normalized by weight ( $n=2$ ). Bars represent mean $\pm$ SEM. \*  $p<0.05$ , \*\*  $p<0.01$  by Wilcoxon rank sum test (B) and two-way ANOVA followed by Sidak's multiple comparison test (C).



**Figure S4**

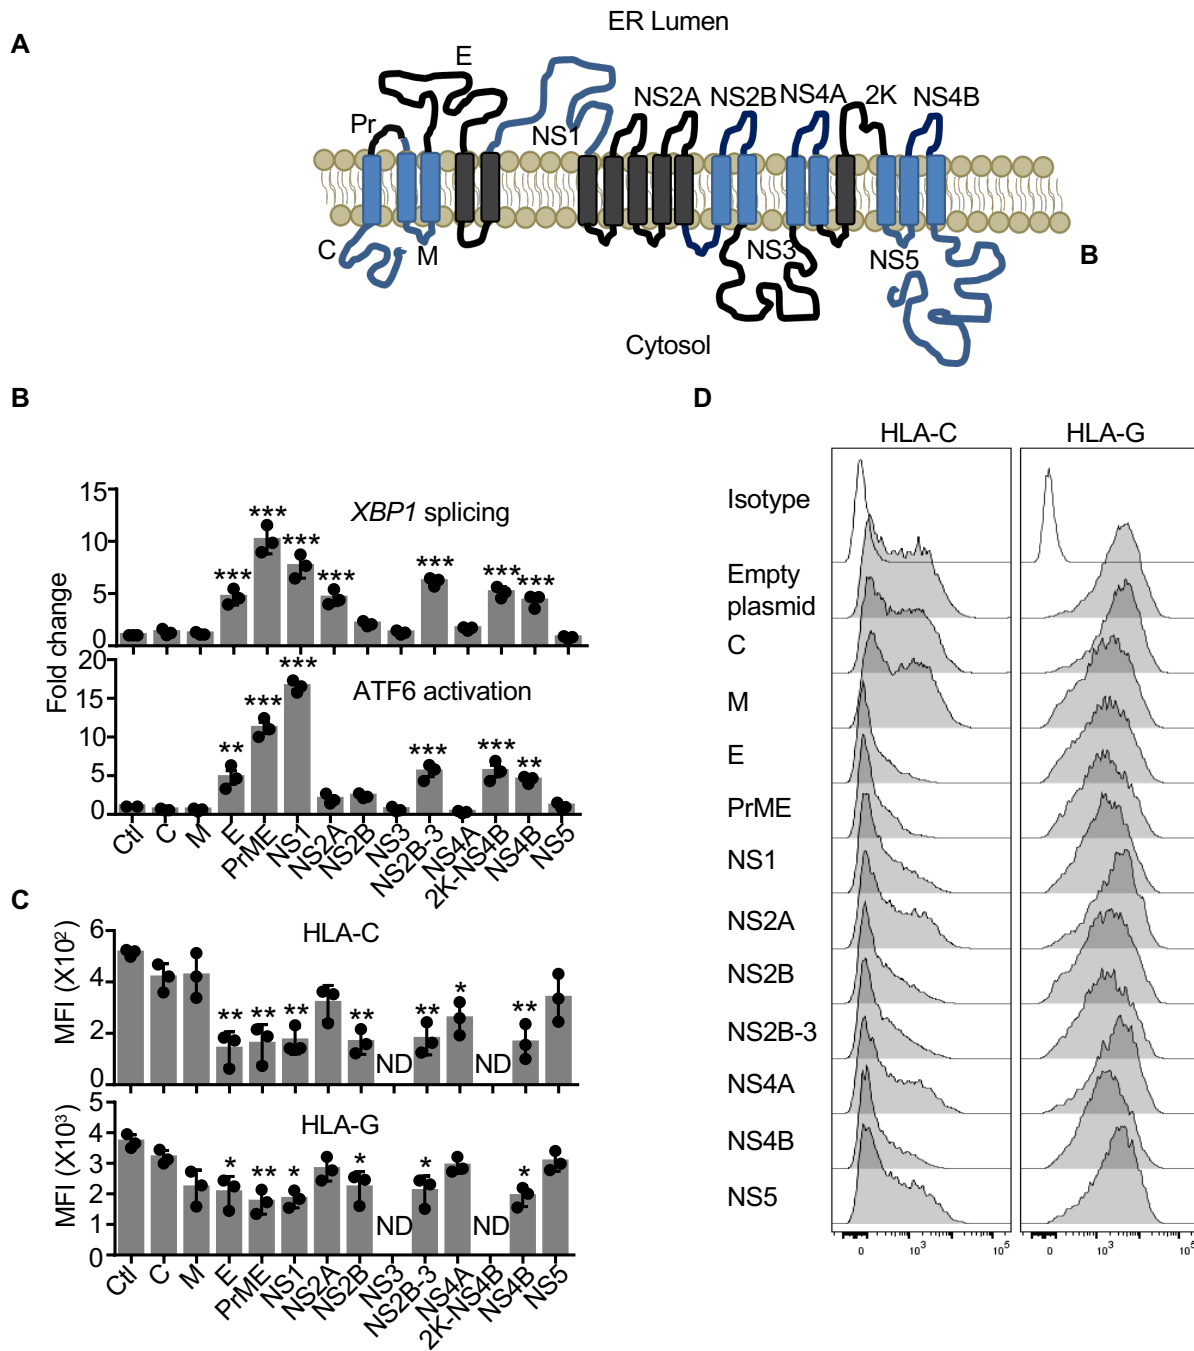

**Figure S4.** (A) Schematic of the localization of the structural and nonstructural proteins of ZIKV in the ER. (B) Effect of overexpression of individual ZIKV proteins on ER stress, measured by detecting firefly and Renilla luciferase activities in the lysates of JEG-3 cells that were co-transfected with either pFLAG-XBP1u-Fluc or p5xATF6-GL3 reporter plasmids with plasmids encoding individual viral proteins. Firefly luciferase activity was normalized to Renilla luciferase activity and shown compared to activity in cells transfected with the empty plasmid control (Ctl). (C) Effect of overexpression of individual ZIKV proteins in HLA-C and HLA-G expression. ND, not done (D) Representative flow cytometry histograms of HLA-C and HLA-G in JEG-3 transfected with plasmids expressing ZIKV proteins or empty plasmid. MFI is shown in B, third and fourth rows. Graphs show mean  $\pm$  SEM of at least 3 experiments. \*,  $p < 0.05$ ; \*\*,  $p < 0.01$ ; \*\*\*,  $p < 0.001$  Statistics analyzed by one-way ANOVA followed by Tukey's post-test relative to control.

**Figure S5**

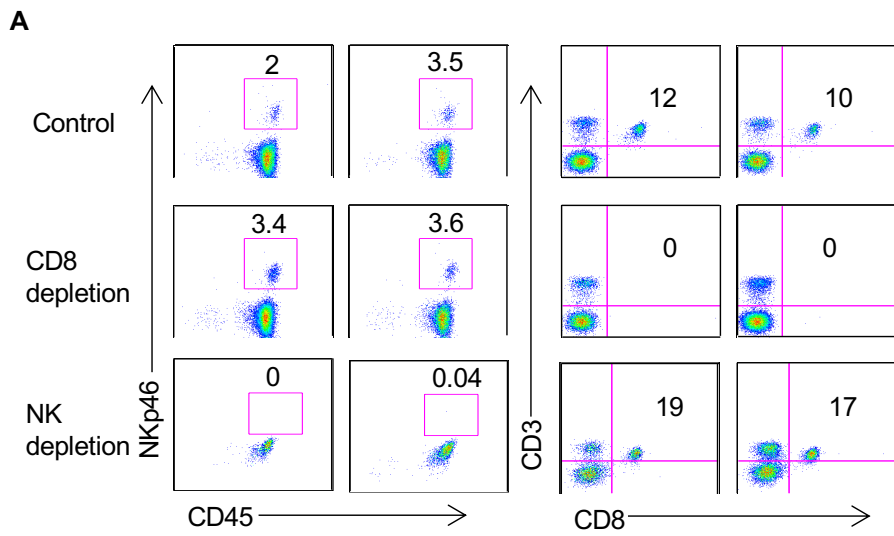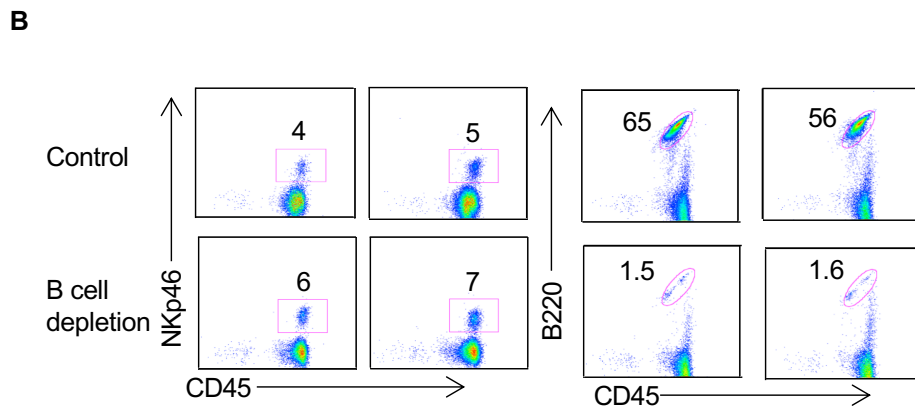

**Figure S5.** Representative flow cytometry plots (of three experiments) showing (A) NK, CD8 T and (B) B cells in blood from control antibody, NK, CD8 or B cell depleting antibody-treated A129 mice

**Supplemental Table S1. Primers used in this study**

| <b>Gene</b>            | <b>Human</b>                                                                                        | <b>Mouse</b>               |
|------------------------|-----------------------------------------------------------------------------------------------------|----------------------------|
| <i>sXBP1</i>           | CTGAGTCCGAATCAGGTGCAG                                                                               | CTGAGTCCGAATCAGGTGCAG      |
|                        | ATCCATGGGGAGATGTTCTGG                                                                               | GTCCATGGGAAGATGTTCTGG      |
| <i>usXBP1</i>          | CAGCACTCAGACTACGTGCA                                                                                | CAGCACTCAGACTATGTGCA       |
|                        | ATCCATGGGGAGATGTTCTGG                                                                               | GTCCATGGGAAGATGTTCTGG      |
| <i>ACTB</i>            | AAGGCCAACCGCGAGAAGAT                                                                                | GCAAGTGCTTCTAGGCGGAC       |
|                        | ACAGCCTGGATAGCAACGTACA                                                                              | AAGAAAGGGTGAAAACGCAGC      |
| <i>ATF4</i>            | GTTCTCCAGCGACAAGGCTA                                                                                | GGGTTCTGTCTTCCACTCCA       |
|                        | ATCCTGCTTGCTGTTGTTGG                                                                                | AAGCAGCAGAGTCAGGCTTTC      |
| <i>CHOP</i>            | AGAACCAGGAAACGGAAACAGA                                                                              | CCACCACACCTGAAAGCAGAA      |
|                        | TCTCCTTCATGCGCTGCTTT                                                                                | AGGTGAAAGGCAGGGACTCA       |
| <i>BiP</i>             | TGTTCAACCAATTATCAGCAAATCTC                                                                          | TTCAGCCAATTATCAGCAAATCTCT  |
|                        | TTCTGCTGTATCCTCTTCACCAGT                                                                            | TTTTCTGATGTATCCTCTTCACCAGT |
| <i>GRP94</i>           | GAAACGGATGCCTGGTGG                                                                                  | AAGAATGAAGGAAAAACAGGACAAAA |
|                        | GCCCCTTCTTCCTGGGTC                                                                                  | CAAATGGAGAAGATTCCGCC       |
| <i>ACTB</i>            | AAGGCCAACCGCGAGAAGAT                                                                                | CATTGCTGACAGGATGCAGAAGG    |
|                        | ACAGCCTGGATAGCAACGTACA                                                                              | TGCTGGAAGGTGGACAGTGAGG     |
| ZIKV primers and probe | CCGCTGCCCAACACAAG<br>CCTACTAACGTTCTTTTGCAGACAT<br>FAM/AGCCTACCT/ZEN/TGACAAGCAATCAGACACTCAA/3IABkFQ/ |                            |
| <i>C</i>               | CTTGAATTCCATGAAAAACCCAAAAAAGAAATCCG<br>CTTGGATCCCTATGCCATAGCTGTGGTCAGCAG                            |                            |
| <i>PrM</i>             | CTTGAATTCCATGGCGGAGGTCACTAGACGTG<br>CTTGGATCCCTAGCTGTATGCCGGGGCAATCA                                |                            |
| <i>E</i>               | CTTGAATTCCATGATCAGGTGCATAGGAGTCAGC<br>CTTGGATCCCTAAGCAGAGACGGCTGTGGATAAGAAG                         |                            |
| <i>NS2A</i>            | CTTGAATTCCATGGGATCAACTGATCACATGGACC<br>CTTGGATCCCTACCGCTTCCCACTCCTTGTGAG                            |                            |

|                      |                                                                                                 |
|----------------------|-------------------------------------------------------------------------------------------------|
| <i>NS2B</i>          | CTTGAATTCCATGAGCTGGCCCCCTAGCGAAG<br>CTTGGATCCCTACCTTTT TCCAGT CTTACGTATAC                       |
| <i>NS3</i>           | CTTGAATTCCATGAGTGGTGCTCTATGGGATGTGC<br>CTTTCTAGACTATCTTTTCCCAGCGGCAAACCTCC                      |
| <i>NS4A</i>          | CTTGGATCCCTATCTTTGCTTTTCTGGCTCAGGTATG<br>CTTGAATTCCATGGGAGCGGCTTTTGGAGTGATGG                    |
| <i>NS4B</i>          | CTT GAATTCC ATG AAT GAA CTC GGA TGG TTG GAG AG<br>CTT GGA TCC CTA ACG TCT CTT GAC CAA GCC AGC G |
| <i>2KNS4b</i>        | CTTGAATTCCATG TCT CCC CAG GACAACCAA ATG G<br>CTT GGA TCC CTA ACG TCT CTT GAC CAA GCC AGC G      |
| <i>NS5</i>           | CTT GAATTCC ACC ATG GGA GGT GGA ACA GGA GAG AC<br>CTT GGT ACC CTA CAG CAC TCC AGG TGT AGA CCC   |
| Human<br><i>IFNB</i> | GAATGGGAGGCTTGAATACTGCCT<br>TAGCAAAGATCTTCTGGAGCATCTC                                           |
| Human<br><i>OAS1</i> | GGTGGAGTTTCGATGTGCTG<br>AGGTTTATAGCCGCCAGTCA                                                    |
| Human<br><i>MX1</i>  | ACCTGATGGCCTATCACCAG<br>TTCAGGAGCCAGCTGTAGGT                                                    |
| <i>HLA-A</i>         | GAC GAC ACG CAG TTC GTG C<br>CAT GTC CGC CGC GGT CCA                                            |
| <i>HLA-B</i>         | ACC AGA GCG AGG CCG GG<br>GTG TCC GCS CGG TCC AG                                                |
| <i>HLA-C</i>         | CGC GCG GAG TCC AAG AGG<br>GTG TCC GCS CGG TCC AG                                               |
| <i>HLA-E</i>         | GCGAGCTGGGGCCCGCCA<br>CCGCCTCAGAGGCATCATTTG                                                     |
| <i>HLA-G</i>         | AGCTGTGGTGGTGCCTTC<br>GGGCAGGGAAGACTGCTT                                                        |

**Supplemental Table S2. Sources and catalog numbers of the reagents used in this study**

| REAGENT or RESOURCE                            | SOURCE                  | IDENTIFIER                        |
|------------------------------------------------|-------------------------|-----------------------------------|
| <b>Antibodies</b>                              |                         |                                   |
| Pacific Orange mouse anti-human CD45           | ThermoFisher Scientific | Clone HI30; Cat.# MHCD4530        |
| PE mouse anti-human CD56                       | BioLegend               | Clone HCD56; Cat.# 318306         |
| Pacific Blue mouse anti-human CD56             | BioLegend               | Clone HCD56; Cat.# 318326         |
| PE-Cy7 mouse anti-human CD14                   | BioLegend               | Clone M5E2; Cat.# 301814          |
| PerCP-Cy5.5 mouse anti-human CD14              | BioLegend               | Clone M5E2; Cat.#301824           |
| AlexaFluor 700™ mouse anti-human CD8           | BioLegend               | Clone SK1; Cat.# 344724           |
| PerCP mouse anti-human CD3                     | BioLegend               | Clone UCHT1; Cat.# 300428         |
| PerCP-Cy5.5 mouse anti-human CD107a            | BioLegend               | Clone H4A3; Cat.# 328616;         |
| PE-Cy7 mouse anti-human IFN-γ                  | BioLegend               | Clone B27; Cat.# 506518           |
| PE mouse anti-human HLA-A2                     | BioLegend               | Clone BB7.2; Cat.# 343306         |
| Biotin mouse anti-human HLA-A11                | Abcam                   | Clone 8.L.170; Cat.# ab31574      |
| FITC mouse anti-human HLA Class I Bw6          | Miltenyi Biotec         | Clone REA143; Cat.# 130-123-325   |
| APC-Vio770 mouse anti-human HLA Class I Bw6    | Miltenyi Biotec         | Clone REA143; Cat.# 130-099-837   |
| VioGreen mouse anti-human HLA Class I Bw6      | Miltenyi Biotec         | Clone REA143; Cat.# 130-099-849   |
| Purified mouse anti-human HLA-C                | Mary Carrington         | Clone DT9                         |
| PE mouse anti-human HLA-E                      | BioLegend               | Clone 3D12; Cat.# 342604          |
| Purified mouse anti-human HLA-E                | BioLegend               | Clone 3D12; Cat.# 342602          |
| PE mouse anti-human HLA-F                      | BioLegend               | Clone 3D11; Cat.# 373204          |
| Purified mouse anti-human HLA-F                | BioLegend               | Clone 3D11; Cat.# 373202          |
| PE mouse anti-human HLA-G                      | Abcam                   | Clone MEM-G/9; Cat.# ab24384;     |
| APC mouse anti-human HLA-G                     | Abcam                   | Clone MEM-G/9; Cat.# a40915       |
| AlexaFluor 488™ mouse anti-human MICA/MICB     | Biolegend               | Clone 6D4; Cat.# 320912           |
| AlexaFluor 700™ mouse anti-human MICA/MICB     | R&D Systems             | Clone 159207; Cat.# FAB13001N-100 |
| PE-Cy7 mouse anti-human B7-H3                  | BioLegend               | Clone MIH42; Cat.# 351008         |
| PE mouse anti-human CD49e                      | BioLegend               | Clone NKI-SAM-1; Cat.# 328010     |
| FITC mouse anti-human CD49e                    | BioLegend               | Clone NKI-SAM-1; Cat.# 328008     |
| Purified mouse anti-human E-Cadherin (CDH-1)   | GeneTex                 | Clone G-4770; Cat.# GTX100443S;   |
| Purified rabbit anti-human CD49e (Integrin α5) | Abcam                   | Polyclonal; Cat.# ab112183        |
| Purified mouse anti-human SDC-1                | BioLegend               | Clone MI15; Cat.# 356523          |
| Purified mouse anti-flavivirus E-glycoprotein  | Abcam                   | Clone 3571; Cat.# ab155882        |

|                                                                                        |                         |                                           |
|----------------------------------------------------------------------------------------|-------------------------|-------------------------------------------|
| Purified mouse anti-flavivirus Group Antigen                                           | EMD-Millipore           | Clone D1-4G2-4-15; Cat.# MAB10216-I-100UG |
| Purified Rabbit anti-Zika Virus NS2B                                                   | GeneTex                 | Polyclonal; Cat.# GTX133308               |
| AlexaFluor 647™ mouse anti-human NKp46                                                 | BioLegend               | Clone 9E2; Cat.# 331910                   |
| AlexaFluor 647™ mouse anti-human NKp30                                                 | BioLegend               | Clone P30-15; Cat.# 325212                |
| AlexaFluor 647™ mouse anti-human NKp44                                                 | BioLegend               | Clone P44-8; Cat.# 325112                 |
| FITC mouse anti-human NKp80                                                            | Miltenyi Biotec         | Clone 4A4.D10; Cat.# 130-094-843          |
| PE mouse anti-human NKG2C                                                              | R&D Systems             | Clone 134591; Cat.# FAB138P-100           |
| APC mouse anti-human NKG2D                                                             | BD Biosciences          | Clone 1D11; Cat.# 562064                  |
| PE-Cy7 mouse anti-human DNAM-1                                                         | BioLegend               | Clone 11A8; Cat.# 338316                  |
| APC-Cy7 mouse anti-human 2B4                                                           | BioLegend               | Clone C1.7; Cat.# 329518                  |
| Ultra-LEAF™ Purified mouse anti-human NKp46                                            | BioLegend               | Clone 9E2; Cat.# 331948                   |
| Ultra-LEAF™ Purified mouse anti-human NKp30                                            | BioLegend               | Clone P30-15; Cat.# 325224                |
| Purified mouse IgG1                                                                    | BioLegend               | Clone MOPC-21; Cat.# 400102;              |
| Purified mouse IgG2a                                                                   | BioLegend               | Clone MOPC-173; Cat.# 400202              |
| AlexaFluor 488™ mouse IgG1 Isotype control                                             | BioLegend               | Clone MOPC-21; Cat.# 400129               |
| PE mouse IgG1 Isotype control                                                          | BioLegend               | Clone MOPC-21; Cat.# 400113;              |
| AlexaFluor 647™ mouse IgG1 Isotype control                                             | BioLegend               | Clone MOPC-21; Cat.# 400130;              |
| PerCP-Cy5.5 mouse IgG1 Isotype control                                                 | BioLegend               | Clone MOPC-21; Cat.#400150;               |
| PE-Cy7 mouse IgG1 Isotype control                                                      | BioLegend               | Clone MOPC-21; Cat.# 400126               |
| APC-Cy7 mouse IgG1 Isotype control                                                     | BioLegend               | Clone MOPC-21; Cat.# 400128               |
| AlexaFluor 488™ mouse IgG2a Isotype control                                            | BioLegend               | Clone MOPC-173; Cat.# 400233;             |
| AlexaFluor 700™ mouse IgG2a Isotype control                                            | BioLegend               | Clone MOPC-173; Cat.# 400248;             |
| PerCP-Cy5.5 hamster anti-mouse CD3                                                     | BD Biosciences          | Clone 145-2C11; Cat.# 100328;             |
| PE rat anti-mouse/human B220                                                           | BioLegend               | Clone RA3-6B2; Cat.# 103208               |
| PerCP-eFluor 710 rat anti-mouse CD8                                                    | eBioscience             | Clone 53-6.7; Cat.# 46-0081-82            |
| PE-Cy7 rat anti-mouse CD45                                                             | BioLegend               | Clone 30-F11; Cat.# 103114                |
| PE rat anti-mouse NKp46                                                                | BioLegend               | Clone 29A1.4; Cat.# 12-3351-82            |
| Purified rabbit anti-mouse/human pan-cytokeratin                                       | Antibodies online       | Polyclonal; Cat.# ABIN969074              |
| Purified rabbit anti-mouse vimentin                                                    | Abcam                   | Clone EPR3776; Cat.# ab92547              |
| Donkey anti-Mouse IgG (H+L) Highly Cross-Adsorbed Secondary Antibody, Alexa Fluor 647™ | ThermoFisher Scientific | Polyclonal; Cat.# A-31571                 |

|                                                                                              |                             |                              |
|----------------------------------------------------------------------------------------------|-----------------------------|------------------------------|
| Donkey anti-Mouse IgG (H+L) Highly Cross-Adsorbed Secondary Antibody, Alexa Fluor 488™       | ThermoFisher Scientific     | Polyclonal; Cat.# A21202     |
| Donkey anti-Rabbit IgG (H+L) Highly Cross-Adsorbed Secondary Antibody, Alexa Fluor Plus 488™ | ThermoFisher Scientific     | Polyclonal; Cat.# A32790     |
| Donkey anti-Rabbit IgG (H+L) Highly Cross-Adsorbed Secondary Antibody, Alexa Fluor Plus 647™ | ThermoFisher Scientific     | Polyclonal; Cat.# A32795     |
| PE goat anti-mouse secondary                                                                 | BioLegend                   | Clone Poly4053; Cat.# 405307 |
| Streptavidin, APC                                                                            | ThermoFisher Scientific     | Cat.# SA1005                 |
| Streptavidin, FITC                                                                           | BD Biosciences              | Cat.# 554060                 |
| Purified rabbit anti-mouse CD20                                                              | BioLegend                   | Clone SA271G2; Cat.#152102   |
| Purified rat anti-mouse CD8α                                                                 | BioXCell                    | Clone 2.43; Cat.# BE0061     |
| Purified rabbit anti-mouse asialo-GM1                                                        | Wako Chemicals              | Antiserum; Cat.# 986-10001   |
| Purified rat IgG2b Isotype control                                                           | BioXCell                    | Clone LTF-2; Cat.# BE0090;   |
|                                                                                              |                             |                              |
| <b>Chemicals, Peptides, and Recombinant Proteins</b>                                         |                             |                              |
| DPBS                                                                                         | Gibco                       | Cat.# 14190250               |
| DMEM                                                                                         | Gibco                       | Cat.# 11965092               |
| RPMI 1640                                                                                    | Corning                     | Cat. # 15-040-CV             |
| DMEM/F12                                                                                     | Gibco                       | Cat.# 11320033               |
| Newborn Calf Serum                                                                           | Gibco                       | Cat.# 16010159               |
| Fetal Calf Serum                                                                             | X&Y Cell Culture            | Cat.# FBS-500-HI             |
| Penicillin/Streptomycin                                                                      | Gibco                       | Cat.# 15140122               |
| L-glutamine                                                                                  | Gibco                       | Cat.# 25030081               |
| TrypLE Express                                                                               | ThermoFisher Scientific     | Cat.# 12605036               |
| Trypsin from porcine pancreas lyophilized powder, Type II-S                                  | Sigma                       | Cat.# T7409-100G             |
| EDTA, disodium, dihydrate                                                                    | American Bioanalytical      | Cat.# AB00500-00100;         |
| Ficoll® Paque Plus                                                                           | GE Healthcare               | Cat.# GE17-1440-02           |
| Human Fibronectin                                                                            | Corning                     | Cat.# 354008                 |
| Collagenase type IV from <i>Clostridium histolyticum</i>                                     | Sigma                       | Cat.# C5138-5G;              |
| Collagenase D from <i>Clostridium histolyticum</i>                                           | Roche                       | Cat.# 11088882001;           |
| Deoxyribonuclease I from bovine pancreas                                                     | Sigma                       | Cat.# DN25-G5;               |
| Red Blood Cell Lysing Buffer Hybri-Max™                                                      | Sigma                       | Cat.# R7757-100ML            |
| Percoll                                                                                      | GE Healthcare               | Cat.# 17089109               |
| Matrigel                                                                                     | Corning                     | Cat.# 354234                 |
| Gentamicin                                                                                   | Gibco                       | Cat.# 15750060               |
| Amphotericin B                                                                               | Sigma                       | Cat.# A2942-20ML             |
| X-Vivo 10 Serum free hematopoietic cell medium                                               | Lonza                       | Cat.# 04-380Q                |
| Human AB Serum                                                                               | Corning (Fisher Scientific) | Cat.# MT-35-060-CI           |
| Recombinant human IL-15                                                                      | BioLegend                   | Cat.# 715902                 |

|                                                      |                            |                                       |
|------------------------------------------------------|----------------------------|---------------------------------------|
| Insulin-Transferrin-Selenium (ITS-G)                 | Gibco                      | Cat.# 41400045                        |
| Recombinant human EGF                                | Peprotech                  | Cat.# AF-100-15;                      |
| Human chorionic gonadotropin                         | Sigma                      | Cat.# C1063-1VL;                      |
| Methylcellulose                                      | Sigma                      | Cat.# M7027                           |
| Avicel RC-591 inf                                    | FMC Corporation            | N/A                                   |
| EMEM 2X without Phenol Red                           | Quality Biologics          | Cat.# 115073101                       |
| Salubrinal                                           | Sigma                      | Cat.# SML0951                         |
| Tunicamycin                                          | Sigma                      | Cat.# T7765                           |
| MTT Formazan                                         | Sigma                      | Cat.# M2003                           |
| Hydrochloric Acid                                    | Sigma                      | Cat.# 320331                          |
| Chromium-51 Radionuclide                             | Perkin Elmer               | Cat.# NEZ030001MC;<br>CAS: 16284-59-6 |
| Protein Transport Inhibitor (Containing Brefeldin A) | BD Biosciences             | Cat.# 555029                          |
| Monensin                                             | BioLegend                  | Cat.# 420701                          |
| EGTA                                                 | Sigma                      | Cat.# E3889-100G                      |
| Paraformaldehyde in PBS, 4%                          | Affymetrix                 | Cat.# AAJ19943K2                      |
| Formaldehyde, 16%, methanol free, Ultra Pure         | Polysciences, Inc          | Cat.# 18814-10; CAS: 50-00-0          |
| Formalin Solution, neutral buffered, 10%             | Sigma                      | Cat.# HT501128                        |
| BSA                                                  | Sigma                      | Cat.# A9418-500G CAS:<br>9048-46-8    |
| Triton X-100                                         | Sigma                      | Cat.# X100-500ML; CAS:<br>9002-93-1   |
| DAPI                                                 | ThermoFisher Scientific    | Cat.# 62248                           |
| Airvol ® 205 Polyvinyl alcohol                       | Air Products and Chemicals | N/A                                   |
| Sucrose                                              | Sigma                      | Cat.# S8501 CAS: 57-50-1              |
| O.C.T. Compound                                      | Tissue Tek                 | Cat.# 4583                            |
| Glycine                                              | Sigma                      | Cat.# 50046; CAS: 7299-33-4           |
| Tween 20                                             | Sigma                      | Cat.# P1379-500ML CAS:<br>9005-64-5   |
| <b>Critical Commercial Assays</b>                    |                            |                                       |
| Human BD Fc Block                                    | BD Biosciences             | Cat.# 564219                          |
| Fixation/Permeabilization Solution Kit               | BD Biosciences             | Cat.# 554714                          |
| LIVE/DEAD™ Fixable Violet Dead Cell Stain Kit        | ThermoFisher Scientific    | Cat.# L34955                          |
| Mix-n-Stain™ CF647 Dye Antibody Labeling Kit         | Biotium                    | Cat.# 92238                           |
| Annexin V APC                                        | BD Biosciences             | Cat.# 550475                          |
| Annexin V Binding Buffer, 10X                        | BD Biosciences             | Cat.# 556454                          |
| RNeasy Mini Kit                                      | Qiagen                     | Cat.# 74104                           |
| DNase I                                              | ThermoFisher Scientific    | Cat.# 89836                           |
| SuperScript II Reverse Transcriptase Kit             | ThermoFisher Scientific    | Cat.# 18064014                        |
| Power SYBR Green PCR Master Mix                      | Applied Biosystems         | Cat.# 4368702                         |
| FuGENE HD Transfection Reagent                       | Promega                    | Cat.# E2311                           |



|                                              |                         |              |
|----------------------------------------------|-------------------------|--------------|
| Dual-Luciferase Reporter Assay System        | Promega                 | Cat.# E1910  |
| RosetteSep Human NK Cell Enrichment Cocktail | STEMCELL Technologies   | Cat.# 15065  |
| All primers                                  | IDT                     |              |
| <b>Plasmids</b>                              |                         |              |
| Flag-tagged pcDNA3.1                         | ThermoFisher Scientific | Cat.# V79520 |
| pFLAG-CMV40                                  | Sigma                   | Cat.# E7158  |
| pFLAG-XBP1u-Fluc                             | Addgene                 | Cat.# 31239  |
| p5xATF6-GL3                                  | Addgene                 | Cat.# 11976  |

## SI References

1. T. Tilburgs, J. H. Evans, A. C. Crespo, J. L. Strominger, The HLA-G cycle provides for both NK tolerance and immunity at the maternal-fetal interface. *Proc Natl Acad Sci U S A* **112**, 13312-13317 (2015).
2. A. C. Crespo, J. L. Strominger, T. Tilburgs, Expression of KIR2DS1 by decidual natural killer cells increases their ability to control placental HCMV infection. *Proc Natl Acad Sci U S A* **113**, 15072-15077 (2016).
3. T. Tilburgs *et al.*, Human HLA-G+ extravillous trophoblasts: Immune-activating cells that interact with decidual leukocytes. *Proc Natl Acad Sci U S A* **112**, 7219-7224 (2015).
4. G. A. Rizzuto, M. Kapidzic, M. Gormley, A. I. Bakardjiev, Human Placental and Decidual Organ Cultures to Study Infections at the Maternal-fetal Interface. *J Vis Exp* 10.3791/54237 (2016).
5. R. S. Lanciotti *et al.*, Genetic and serologic properties of Zika virus associated with an epidemic, Yap State, Micronesia, 2007. *Emerg Infect Dis* **14**, 1232-1239 (2008).
